# Supplementary material for: Notch Pathway Activity Identifies Cells with Cancer Stem Cell–like Properties and Correlates with Worse Survival in Lung Adenocarcinoma
Source: Oxford University Press journal article supplement (doi:10.1158/1078-0432.ccr-12-0370), 2013-02-26

**Supplementary Figure 5.** A) Tumor growth in NCI-H1299 mouse xenograft after *in vivo* treatment. MRK003 alone did not cause significant decrease in tumor growth; docetaxel and docetaxel/MRK003 combination caused significant growth inhibition compared to control. B) Expression of Notch pathway component by RT-PCR in xenograft tumors after treatment with docetaxel or MRK003 as compared to control.

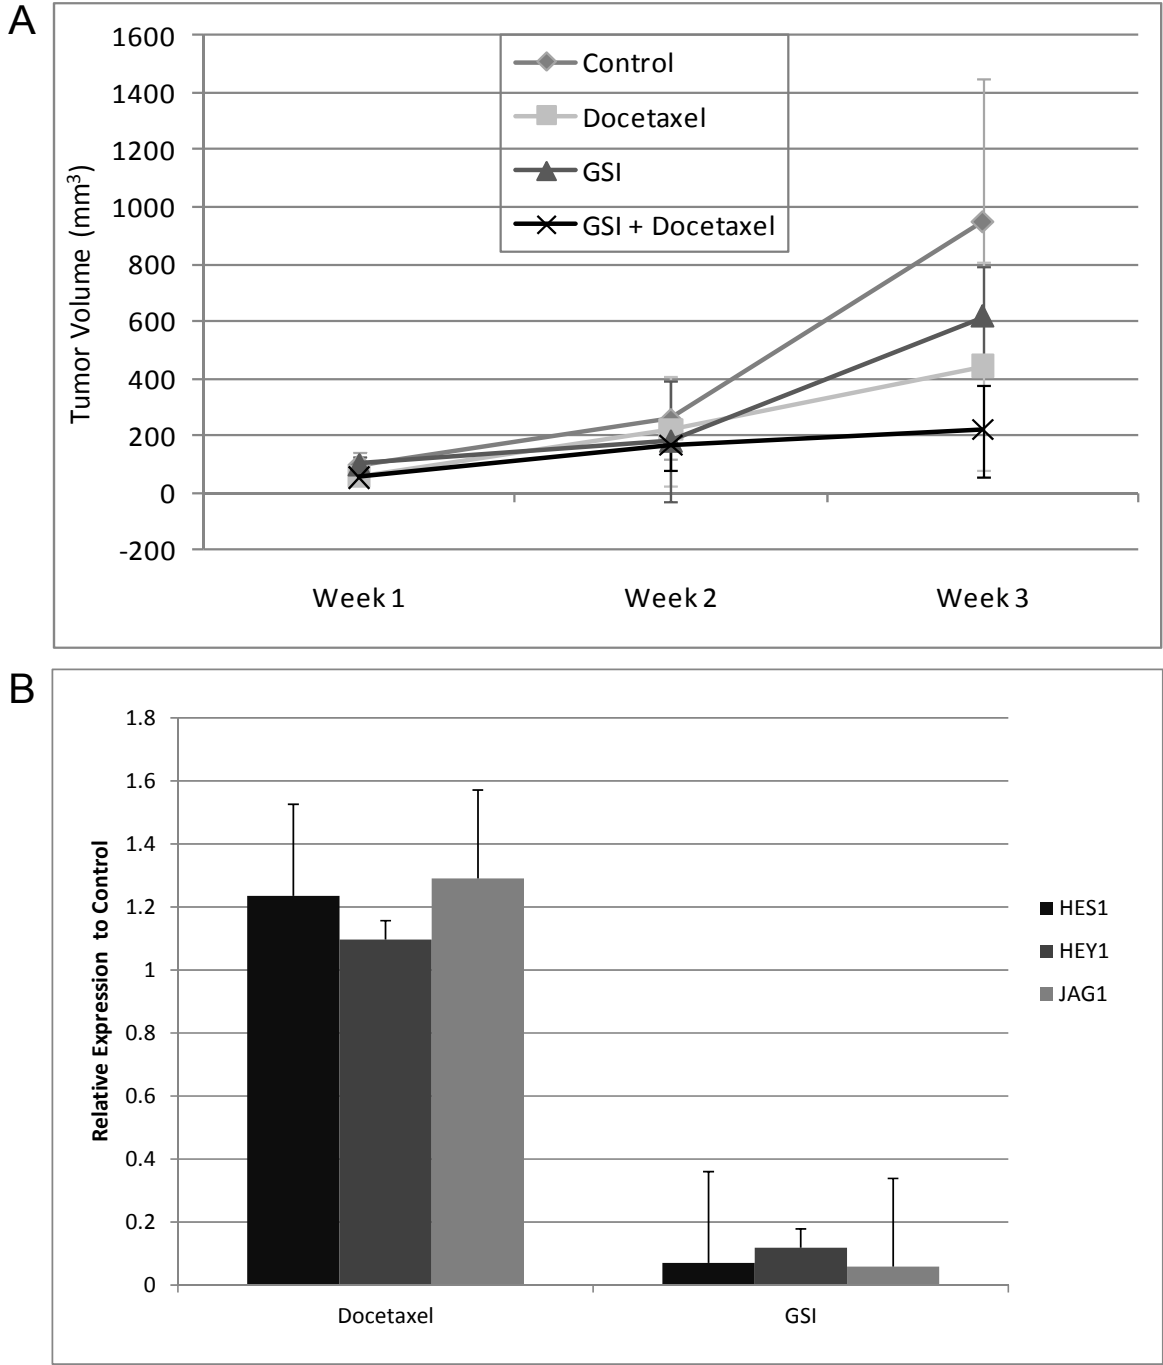

Supplement: 10780432ccr120370-sup-fig5.pdf [file 10780432ccr120370-sup-fig5.pdf]
